# Supplementary material for: Ion-transporting channel-embedded MOF-in-COF structures as composite quasi-solid electrolytes with highly enhanced electrochemical properties
Source: Royal Society of Chemistry journal article supplement (doi:10.1039/d3ta07329g), 2024-01-01
Supplement: d3ta07329g1.pdf [file d3ta07329g1.pdf]

## Electronic Supplementary Information

### Ion-Transporting Channel-Embedded MOF-in-COF Structure as Composite Quasi-Solid Electrolytes with Highly Enhanced Electrochemical Properties

*Kai Le Loo<sup>a</sup>, Jeong Won Ho<sup>b</sup>, Chan-Hwa Chung<sup>a</sup>, Myoung-Woon Moon<sup>c</sup>, and*

*Pil J. Yoo<sup>a,b,c,d\*</sup>*

- a. School of Chemical Engineering, Sungkyunkwan University (SKKU), Suwon, 16419, Republic of Korea.
- b. SKKU Advanced Institute of Nanotechnology (SAINT), Sungkyunkwan University (SKKU), Suwon, 16419, Republic of Korea.
- c. KIST-SKKU Carbon-Neutral Research Center, Sungkyunkwan University (SKKU), Suwon 16419, Republic of Korea
- d. SKKU Institute of Energy Science and Technology (SIEST), Sungkyunkwan University (SKKU), Suwon, 16419, Republic of Korea.

\* Corresponding authors: pjyoo@skku.edu (P. J. Yoo).

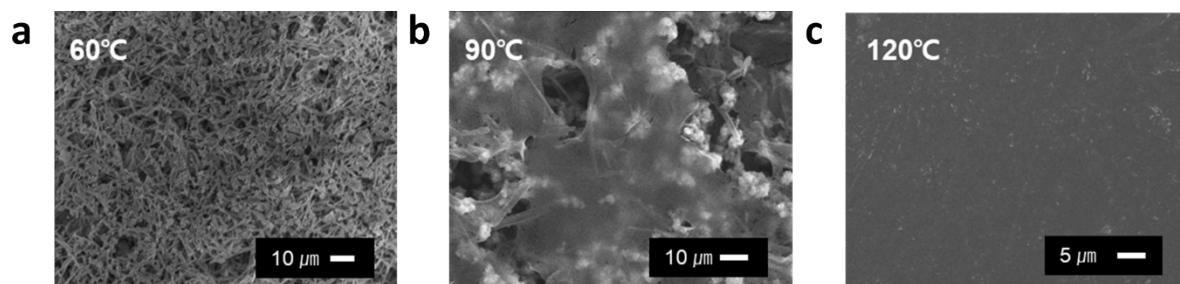

**Figure S1.** FE-SEM images of surface of the TpPa COF at (a) 60 °C showing fibrous structure, (b) 90 °C showing aggregation and formation of film, (c) 120 °C showing a smooth film structure.

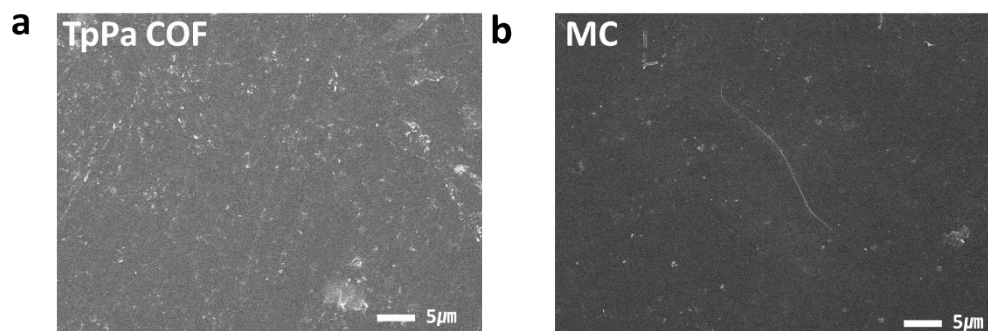

**Figure S2.** SEM images of film surfaces for (a) TpPa COF and (b) MC.

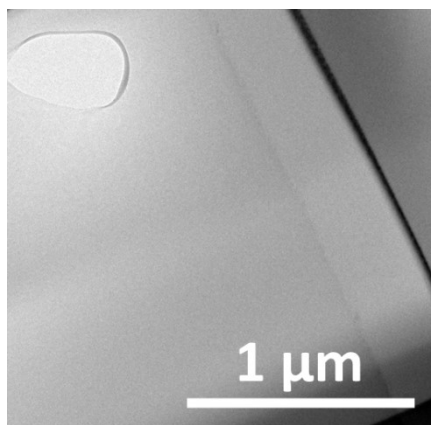

**Figure S3.** FIB-TEM image of MC film surface.

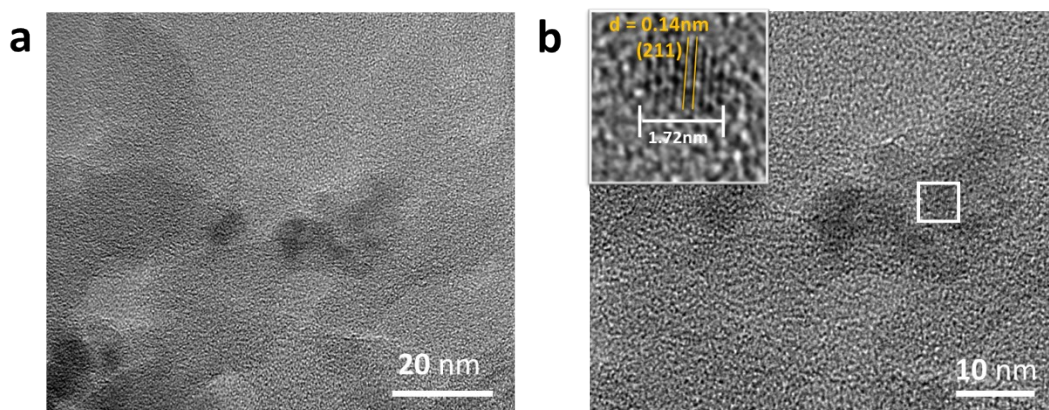

**Figure S4.** (a)TEM image and (b)HR-TEM image of MC film grinded to powder with inset image showing the presence of (211) lattice fringe of ZIF-8 in TpPa COF.

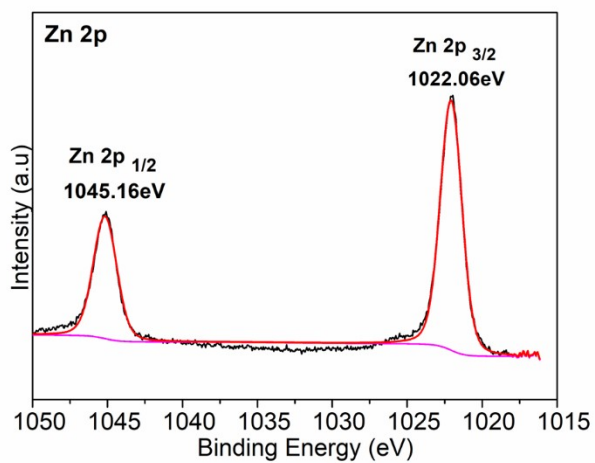

**Figure S5.** High resolution XPS for Zn 2p element in MC film.

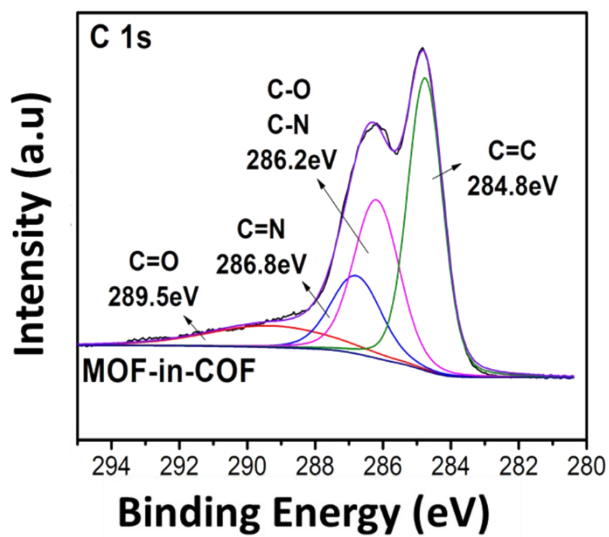

**Figure S6.** High resolution XPS for C 1s element in MC film.

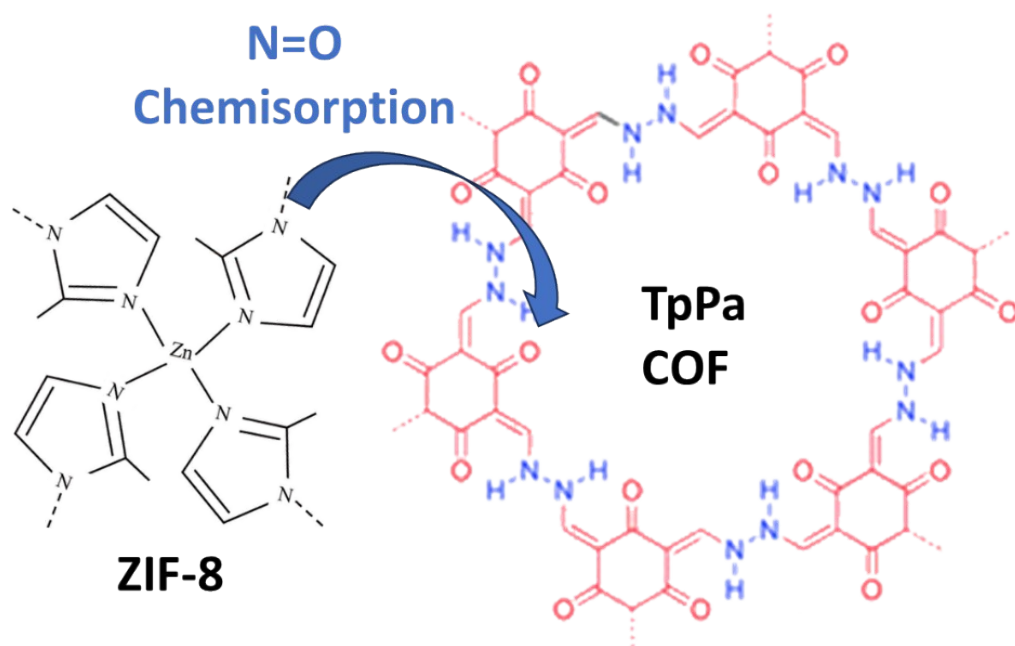

**Figure S7.** Scheme of the mechanism for ZIF-8 incorporation into TpPa COF pore by N=O chemisorption.

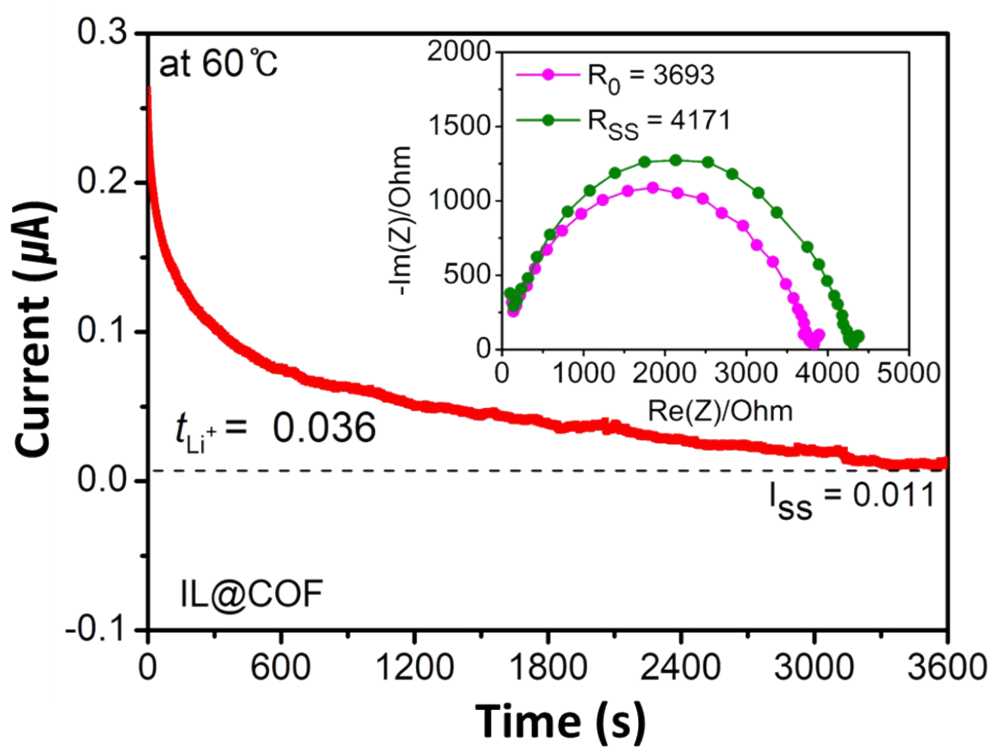

**Figure S8.** Chronoamperometry curve of a Li|IL@COF|Li symmetric cell under 10 mV polarization at 60°C. Inset: Nyquist plots of IL@COF before and after polarization.

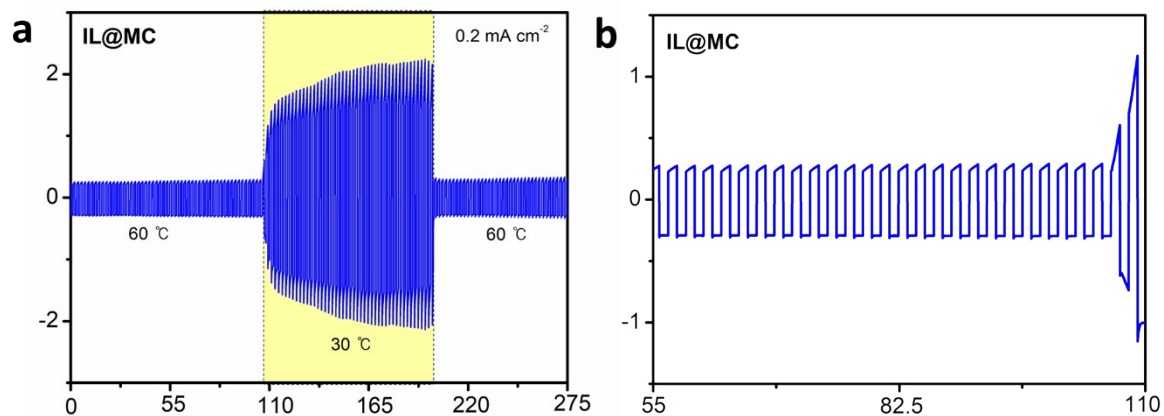

**Figure S9.** (a) Lithium plating and stripping of IL@MC at different temperature. (b) The enlarged view of the graph between 55 and 110 h reveals a steady overpotential up until the moment when the temperature began to gradually decrease to 30 °C after the 100 h.

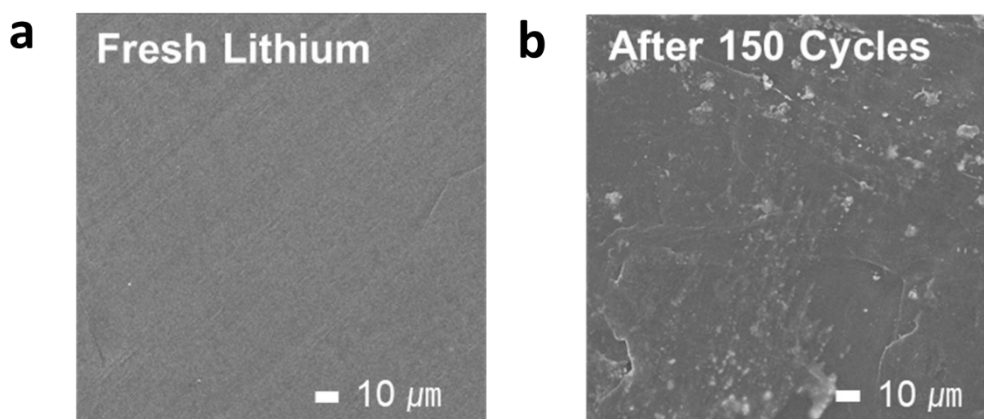

**Figure S10.** Surface FE-SEM image of (a) fresh lithium and (b) lithium anode of Li|IL@MC|Li cell after 100 cycles.

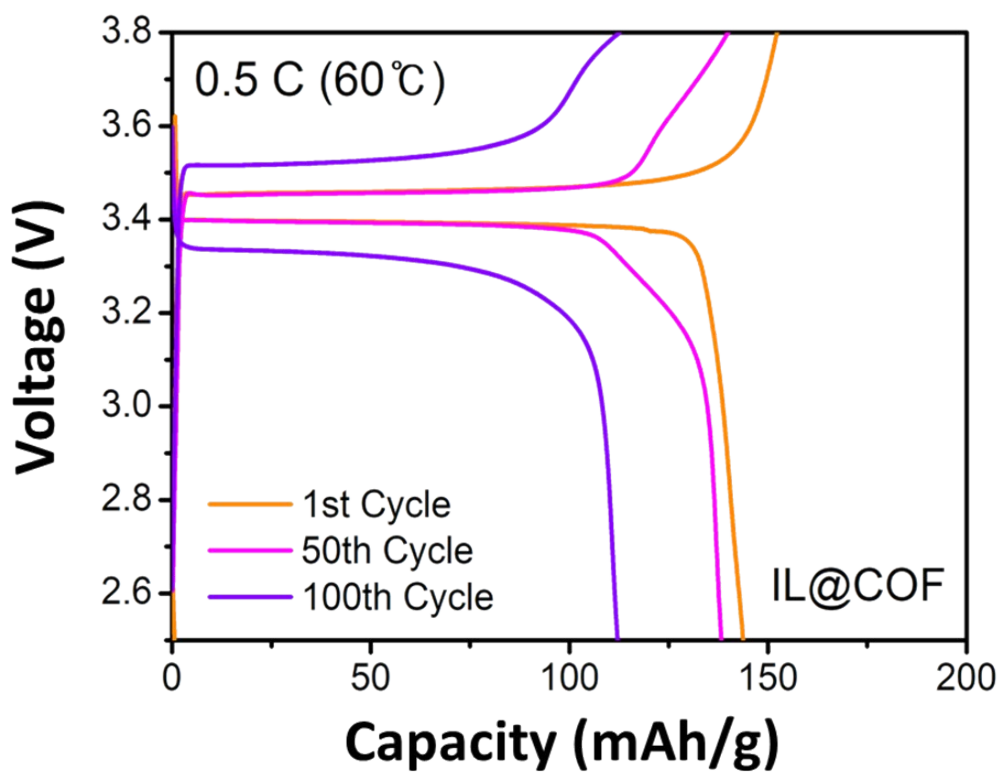

Figure S11. Charge-discharge profile of LFP|IL@COF|Li at various cycle.
